# Supplementary material
Source: PubMed Central journal article supplement (PMC3222816)
Supplement: emm-43-550-s001.pdf [file emm-43-550-s001.pdf]

## Supplemental data

Jung *et al.*, Methylation of eukaryotic elongation factor 2 induced by basic fibroblast growth factor via MAPK

Supplementary Figure S1

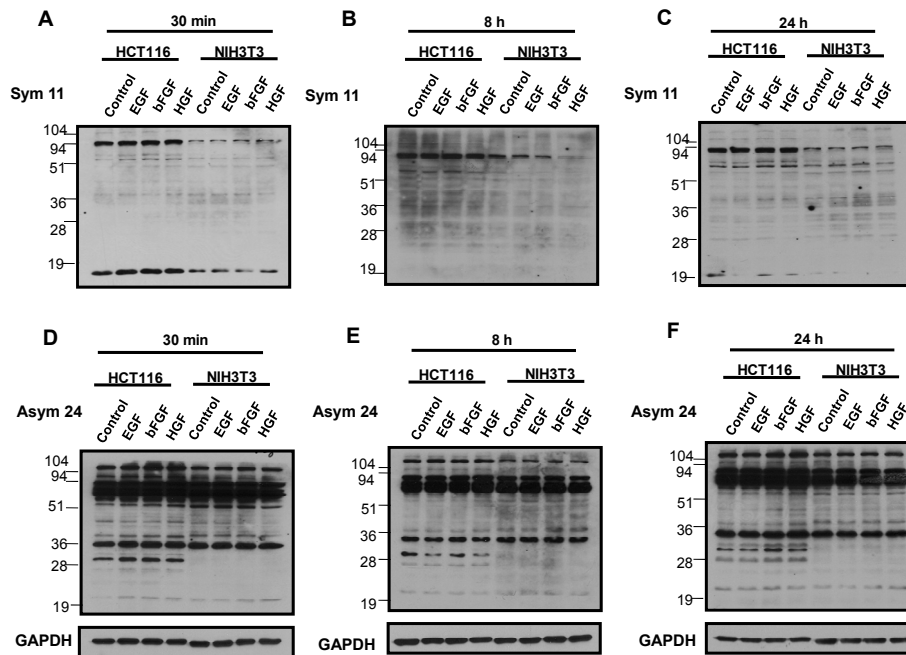

**Supplementary Figure S1. No significant change in protein arginine methylation patterns as detected by SYM11 and ASYM24 was induced by growth factors such as EGF, bFGF and HGF in NIH3T3 and HCT116 cells.**

Symmetrically (A-C) and asymmetrically (D-F) dimethylated arginines on proteins in cell lysates obtained 30 min (A, D), 8 h (B, E), 24 h (C, F) after the administration of growth factors were detected by Western blots using SYM11 for symmetric dimethylation of arginine or ASYM24 for asymmetric dimethylation of arginine. Cells were cultured in the absence or presence of EGF, bFGF, or HGF and cell lysates were prepared at indicated time points. Western blot analysis was performed with SYM11 and ASYM24, respectively.

GAPDH was used as a loading control. Protein bands were visualized using enhanced chemiluminescence.

### Supplementary Table S1

Identification of the 95-kDa protein by mass spectrometry in which symmetric dimethylation of arginine was induced by bFGF as detected by SYM10 .

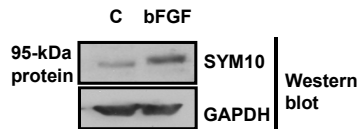

| Sample                      | Protein name                                  | NCBI accession number       | kDa/pi    | Z score | MS analysis % coverage |
|-----------------------------|-----------------------------------------------|-----------------------------|-----------|---------|------------------------|
| Control 95-kDa protein      | EE eukaryotic translation elongation factor 2 | gi 26328763 dbj BAC28120.1  | 95.24/6.5 | 1.40    | 23                     |
| bFGF-treated 95-kDa protein | EE eukaryotic translation elongation factor   | gi 33859482 ref NP_031933.1 | 95.30/6.4 | 1.56    | 29                     |

### Supplementary Table S2

Sequence coverage of peptides identified by mass spectrometry of eEF2

1 **MVNFTVDQIR** **AIMDKKANIR** NMSVIAHVDH GK**STLTDSL**V CKAGIIASAR  
51 AGETRFDTDR KDE**EQERCITI** K**STAISLFYE** L**SENDLNFIK** QSKDGS**GFLI**  
101 **NLIDSPGHVD** **FSSEVTAALR** **VTDGALVVVD** **CVSGVCVQTE** **TVLRQAIAR**  
151 **IKPVLMMNKM** **DRALLELQLE** **PEELYQTFQR** IVENVNIIS TYGEGESGPM  
201 GNIMDPVLG TVGF**GSGLHG** **WAFTLKQFAE** **MYVAK**FAAKG EGQL**SAAERA**  
251 **KKVEDMMKKL** WGD**RYFD**PAN GK**FKSANS**P **DGKKLPR**TFC **QLILDPI**FKV  
301 **FDAIMNFRKE** **ETAKLIEKLD** IKL**DSEDKD** **EGKPLLKAVM** **RRWLPAG**DAL  
351 **LQMITHLPS** **PVTAQKYRCE** **LLYEGPPDDE** **AAMGIK**SCDP **KGPLMMY**ISK  
401 **MVPTSDKGRF** **YAFGRV**FSGV **VSTGLKVRIM** **GPNYTPG**KKE **DLYLKPI**QRT  
451 **ILMMGRYVEP** **IEDVPCGNIV** **GLVGVDQFLV** **KTGTIT**TFEH **AHNMRVM**KFS  
501 **VSPVVRVAVE** **AKNPADL**PKL **VEGLKRLAKS** **DPMVQCIIE** **SGEHIIAG**AG  
551 **ELHLEICLKD** **LEEDHACIPI** **KKSDPVV**SYR **ETVSEES**NVL **CLSKSPN**KHN  
601 **RLYMKAR**PFPP **DGLAEDIDKG** **EVSARQELKA** **RARYLAEK**YE **WDVAEARKI**W  
651 **CFGPDGTGPN** **ILTDITKGVQ** **YLNEIKDSVV** **AGFQWATKEG** **ALCEENMRG**V  
701 **RFDVHDVTLH** **ADAIHRGGGQ** **IPTARRCLY** **ASVLTAQ**PRL **MEPIYLVEI**Q  
751 **CPEQVGGIY** **GVLNRKR**GHV **FEESQVAGTP** **MFVVKAYLPV** **NESFGFTADL**  
801 **RSNTGGQAFP** **QCVFDHWQIL** **PGDPFDN**SSR **PSQVVAETRK** **RKGLK**EGIPA  
851 **LDNFLDKL**

1. Sequence Coverage: **81%**
2. Matched peptides shown in **Bold Red**

**Supplementary Table S3**

Validation of siRNA inhibition of PRMT5 and PRMT7 mRNA expression in NIH3T3 cells by real-time quantitative PCR

| siRNA transfected | primer | Reduction(%) |
|-------------------|--------|--------------|
| PRMT5 siRNA       | PRMT5  | 71           |
| PRMT7 siRNA       | PRMT7  | 46           |
| PRMT5+PRMT7 siRNA | PRMT5  | 35           |
|                   | PRMT7  | 34           |

\* Actin was used for normalization

## Materials and methods

### MS analysis

Analysis of arginine methylation was performed as previously described (Kirino *et al.*, 2010). A 95-kDa arginine-methylated protein gel band was excised from SDS-PAGE gel.

The protein band was subjected to reduction in 10 mM dithiothreitol for 45 min at 37°C and alkylation in 55 mM iodoacetamide for 15 min at room temperature in the dark and was digested overnight at 37°C with 12.5 ng/μl trypsin (Promega, Madison, WI, USA).

The digested peptides were acidified to 0.1% trifluoroacetic acid and desalted onto C18 Ziptips (Millipore, Billerica, MA, USA) according to the manufacturer's instruction.

The desalted peptides were analyzed in an LCQ Deca mass spectrometer (Thermo Fisher Scientific, Waltham, MA, USA) coupled online to an Agilent 1100 HPLC system.

An in-house pulled 0.075 × 130 mm emitter column was prepared by packing with

Zorbax 300SB-C18, 5  $\mu\text{m}$  (Agilent, Santa Clara, CA, USA) using a slurry packer (Alltech, Lexington, Ky, USA). Peptides were separated with a linear acetonitrile gradient: 0 % solvent A (5% acetonitrile, 0.1% formic acid) to 40% solvent B (95% acetonitrile, 0.1% formic) over 80 min and then 90% solvent B in 15 min at a flow rate of 0.2  $\mu\text{L}/\text{min}$ . For tandem mass spectrometry, MS and MS/MS data were obtained in a data-dependent mode. The full mass scan range mode was  $m/z = 250 - 2000$  Da for the selection of a precursor ion. An exclusion dynamic mode was applied to exclude the most intense ion from further selection over a 2-min period. The subsequent MS/MS data were acquired using a 2  $m/z$  unit ion isolation window in the automated gain control (AGC) mode where AGC values of  $5.00\text{e}+05$  and  $1.00\text{e}+04$  were set for full MS and MS/MS, respectively. The normalized CID was set at 35.0.

## Reference

Kirino Y, Vourekas A, Kim N, de Lima Alves F, Rappsilber J, Klein PS, Jongens TA and Mourelatos Z. Arginine methylation of vasa protein is conserved across phyla. *J Biol Chem* 2010;285:8148-54
